# Supplementary material for: Self-Powered Flow Rate Sensing via a Single-Electrode Flowing Liquid Based Triboelectric Nanogenerator
Source: MDPI journal article supplement (doi:10.3390/mi15030384), 2024-03-13
Supplement: s1 [file s1]

Supplementary Materials

# Self-Powered Flow Rate Sensing via a Single-Electrode Flowing Liquid Based Triboelectric Nanogenerator

Duy-Linh Vu <sup>1</sup>, Quang-Tan Nguyen <sup>2</sup>, Pil-Seung Chung <sup>1,3,\*</sup> and Kyoung-Kwan Ahn <sup>2,\*</sup>

<sup>1</sup> Department of Nanoscience and Engineering, Inje University, 197 Inje-ro, Gimhae-si 50834, Gyeongsangnamdo, Republic of Korea; vuduylinhbk@gmail.com

<sup>2</sup> School of Mechanical Engineering, University of Ulsan, 93 Daehak-ro, Nam-gu, Ulsan 44610, Republic of Korea; pax.quangtan@gmail.com

<sup>3</sup> Department of Energy Engineering, Inje University, 197 Inje-ro, Gimhae-si 50834, Gyeongsangnamdo, Republic of Korea

\* Correspondence: pschung01@inje.ac.kr (P.-S.C.); kkahn@ulsan.ac.kr (K.-K.A.)

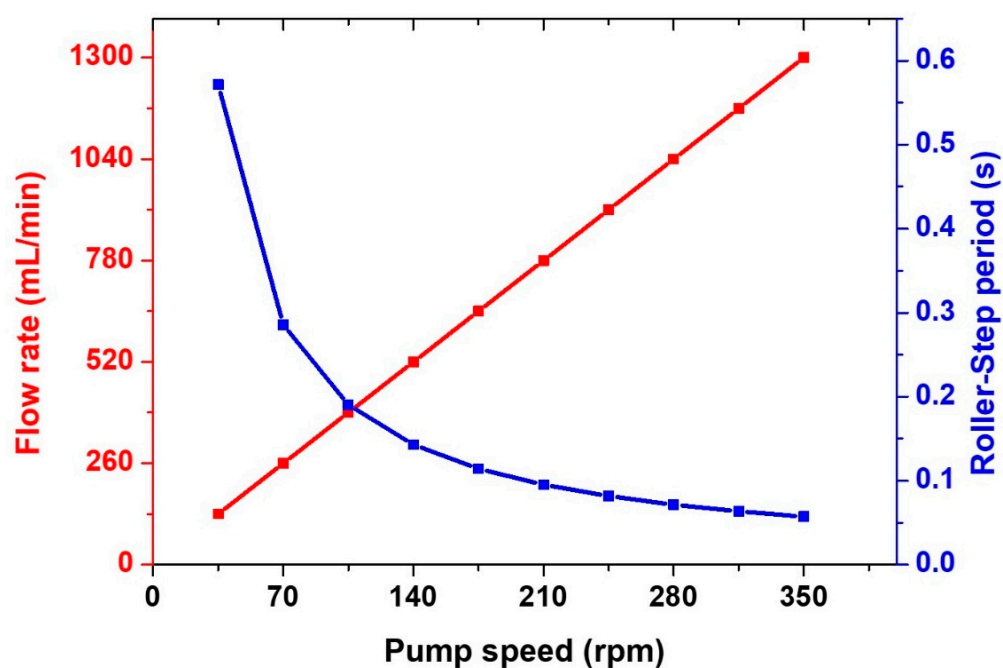

Figure S1. Characteristics of the peristaltic pump with 8 mm-cell FL-TENG.

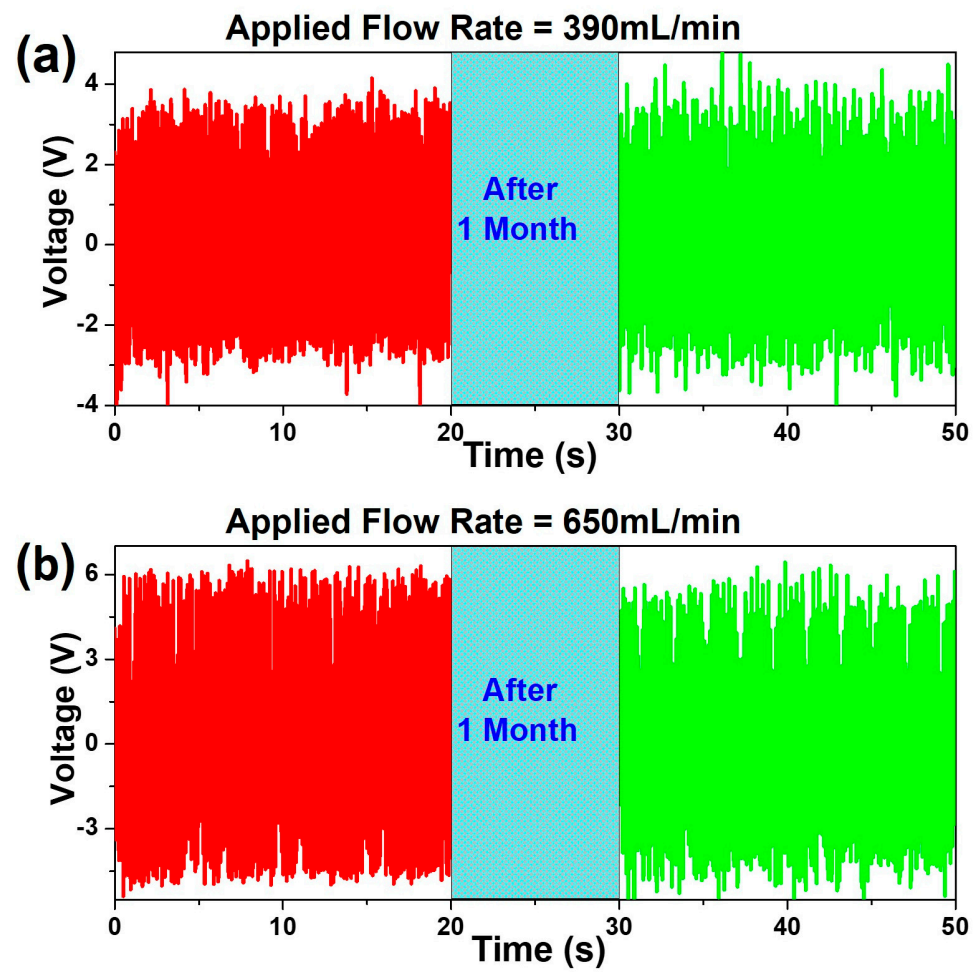

**Figure S2.** Stability and durability of the FL-TENG: output voltage measured at (a) 390 and (b) 650 mL/min of the FL-TENG at two moments one month apart.
